# Supplementary material
Source: Springer Nature journal article supplement (https://www.springermedizin.de/resource/supplementary/13256_2014_3018_MOESM1_ESM.pdf/9651070)

Right

Left

**a**

Before  
embolization

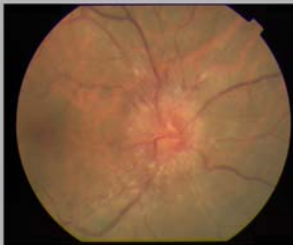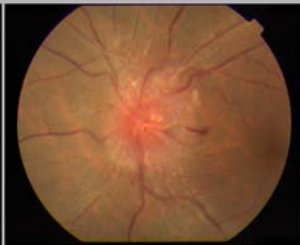

**b**

After  
embolization

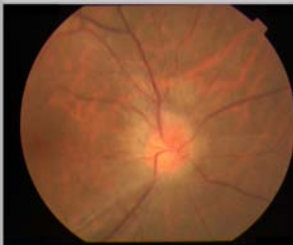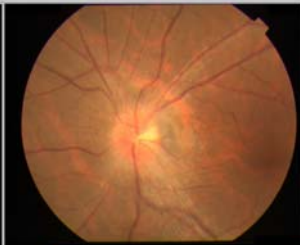

**c**

4 years  
later

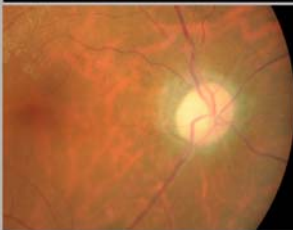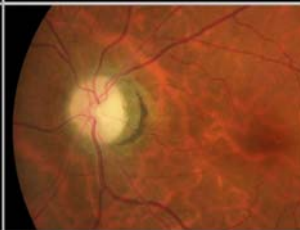

Supplement: MOESM1 [file 9651070]
